# Supplementary material for: Fluorosulfonyl-(trifluoromethanesulfonyl)imide ionic liquids with enhanced asymmetry
Source: Royal Society of Chemistry journal article supplement (doi:10.1039/c2cp43066e), 2012-12-12
Supplement: c2cp43066e.pdf [file c2cp43066e.pdf]

Supplementary information:

**NMR analysis of the ionic liquids:**

The  $^1\text{H}$ ,  $^{13}\text{C}$  and  $^{19}\text{F}$  spectra were acquired on an Avance III Bruker spectrometer with a permanent field of 9.397 T.

***N-butyl-N-methylpyrrolidinium fluorosulfonyl-(trifluoromethanesulfonyl)imide***  
**(PYR<sub>14</sub>FTFSI):**

$^1\text{H}$ -NMR: (DMSO- $\text{D}_6$ )  $\delta$  = 0.89 (t,  $J$  = 7.4 Hz, 3H), 1.37 (sext.,  $J$  = 7.4 Hz, 2H), 1.72 (m, 2H), 2.12 (m, 4H), 3.02 (s, 1H), 3.33 (m, 2H), 3.49 (m, 4H)

$^{13}\text{C}$ - $\{^1\text{H}\}$ -NMR: (DMSO- $\text{D}_6$ )  $\delta$  = 14.25, 20.19, 21.99, 25.84, 48.45, 63.93, 64.38, 120.5 (q,  $J$  = 322 Hz)

$^{19}\text{F}$ -NMR: (DMSO- $\text{D}_6$ )  $\delta$  = -77.88 (d,  $J$  = 3.4 Hz, 3F), 57.51 (q,  $J$  = 3.4 Hz, 1F)

***N-methyl-N-propylpyrrolidinium fluorosulfonyl-(trifluoromethanesulfonyl)imide***  
**(PYR<sub>13</sub>TFSI):**

$^1\text{H}$ -NMR: (DMSO- $\text{D}_6$ )  $\delta$  = 0.95 (t,  $J$  = 7.3 Hz, 3H), 1.37 (m, 2H), 2.12 (m, 4H), 3.01 (s, 3H), 3.29 (m, 2H), 3.49 (m, 4H)

$^{13}\text{C}$ - $\{^1\text{H}\}$ -NMR: (DMSO- $\text{D}_6$ )  $\delta$  = 11.25, 17.45, 21.99, 48.46, 64.35, 65.42, 120.5 (q,  $J$  = 322 Hz)

$^{19}\text{F}$ -NMR: (DMSO- $\text{D}_6$ )  $\delta$  = -77.88 (d,  $J$  = 3.4 Hz, 3F), 57.51 (q,  $J$  = 3.4 Hz, 1F)

***N-methoxyethyl-N-methylpyrrolidinium fluorosulfonyl-(trifluoromethanesulfonyl)imide***  
**PYR<sub>1201</sub>FTFSI:**

$^1\text{H}$ -NMR: (DMSO- $\text{D}_6$ )  $\delta$  = 2.12 (m, 4H), 3.35 (s, 3H), 3.53 (m, 4H), 3.59 (m, 2H), 3.78 (m, 2H)

$^{13}\text{C}$ - $\{^1\text{H}\}$ -NMR: (DMSO- $\text{D}_6$ )  $\delta$  = 21.80, 48.97, 59.03, 62.99, 65.08, 66.92, 120.5 (q,  $J$  = 322 Hz)

$^{19}\text{F}$ -NMR: (DMSO- $\text{D}_6$ )  $\delta$  = -77.88 (d,  $J$  = 3.4 Hz, 3F), 57.51 (q,  $J$  = 3.4 Hz, 1F)
